# Supplementary material for: Quest for ultralong C–C bonds in [1.1.1]propellane derivatives: a theoretical study
Source: Royal Society of Chemistry journal article supplement (doi:10.1039/d3nj04166b), 2023-11-29
Supplement: d3nj04166b1.pdf [file d3nj04166b1.pdf]

### Supporting information

**Table S1.** Singlet – triplet gap ( $\Delta E_{ST}$ , kcal/mol) of the molecules. Positive value of  $\Delta E_{ST}$  means singlet is more stable.

| Molecules | $\Delta E_{ST}$ |
|-----------|-----------------|
| <b>I</b>  | 83.4            |
| <b>2a</b> | 98.5            |
| <b>2b</b> | 87.8            |
| <b>2c</b> | 71.5            |
| <b>2d</b> | 34.5            |
| <b>2e</b> | 32.0            |

**Table S2.** AIM properties at the bond critical point of “inverted” C-C bonds in **I**, **2a-2e** calculated at B2PLYP/6-311++G\*\* level. All values are in a. u.

|           | $\rho(r)$ | $\nabla^2\rho$ |
|-----------|-----------|----------------|
| <b>I</b>  | 0.181     | 0.11           |
| <b>2a</b> | 0.147     | 0.23           |
| <b>2b</b> | 0.104     | 0.12           |
| <b>2c</b> | 0.091     | 0.15           |
| <b>2d</b> | -         | -              |
| <b>2e</b> | 0.093     | 0.04           |

Cartesian coordinates of the optimized geometries using B2PLYP/6-311++G\*\* level.

**I**

|   |              |              |              |
|---|--------------|--------------|--------------|
| 6 | -0.000071000 | 0.000033000  | -0.794780000 |
| 6 | -0.000053000 | 0.000012000  | 0.794883000  |
| 6 | -0.048938000 | 1.296262000  | -0.000008000 |
| 6 | -1.098216000 | -0.690544000 | -0.000025000 |
| 6 | 1.147239000  | -0.605747000 | -0.000046000 |
| 1 | 2.088347000  | -0.066774000 | -0.000048000 |
| 1 | 1.232942000  | -1.686823000 | -0.000046000 |
| 1 | -0.986220000 | 1.841795000  | 0.000009000  |
| 1 | 0.844432000  | 1.911068000  | -0.000015000 |
| 1 | -2.077408000 | -0.224359000 | -0.000024000 |
| 1 | -1.101861000 | -1.775002000 | -0.000021000 |

**2a**

|   |              |              |              |
|---|--------------|--------------|--------------|
| 6 | 0.000214000  | 0.000342000  | -0.853114000 |
| 6 | 0.000203000  | 0.000324000  | 0.853124000  |
| 6 | 1.199523000  | 0.424980000  | 0.000012000  |
| 6 | -0.967810000 | 0.825970000  | 0.000003000  |
| 6 | -0.231555000 | -1.250633000 | -0.000015000 |
| 9 | 0.686152000  | -2.211883000 | -0.000021000 |
| 9 | -1.432828000 | -1.819064000 | -0.000030000 |
| 9 | 1.573469000  | 1.700273000  | 0.000028000  |
| 9 | 2.292296000  | -0.331341000 | 0.000010000  |
| 9 | -0.860599000 | 2.150632000  | 0.000017000  |
| 9 | -2.258874000 | 0.510727000  | -0.000009000 |

**2b**

|    |              |              |              |
|----|--------------|--------------|--------------|
| 6  | 0.000085000  | -0.000090000 | -0.987975000 |
| 6  | 0.000077000  | -0.000096000 | 0.987962000  |
| 14 | 1.540875000  | -0.373289000 | -0.000007000 |
| 14 | -0.447136000 | 1.521001000  | 0.000005000  |
| 14 | -1.093783000 | -1.147652000 | 0.000004000  |
| 1  | -0.770521000 | -2.586270000 | -0.000007000 |
| 1  | -2.546295000 | -0.894059000 | -0.000045000 |
| 1  | 2.624958000  | 0.626157000  | 0.000057000  |
| 1  | 2.047655000  | -1.757950000 | 0.000012000  |
| 1  | 0.498565000  | 2.652238000  | 0.000052000  |
| 1  | -1.854708000 | 1.960162000  | -0.000027000 |

**2c**

|    |              |              |              |
|----|--------------|--------------|--------------|
| 6  | -0.000002000 | 0.000167000  | 1.041507000  |
| 6  | -0.000033000 | 0.000172000  | -1.041508000 |
| 14 | 1.335481000  | 0.749428000  | -0.000018000 |
| 14 | -0.018647000 | -1.531087000 | -0.000003000 |

|    |              |              |              |
|----|--------------|--------------|--------------|
| 14 | -1.316826000 | 0.781810000  | 0.000021000  |
| 9  | -1.484621000 | 2.366136000  | 0.000027000  |
| 9  | -2.787712000 | 0.169631000  | 0.000041000  |
| 9  | 2.791063000  | 0.101643000  | -0.000040000 |
| 9  | 1.541966000  | 2.329188000  | -0.000017000 |
| 9  | 1.246662000  | -2.499217000 | -0.000024000 |
| 9  | -1.307347000 | -2.467843000 | 0.000013000  |

**2d**

|   |              |              |              |
|---|--------------|--------------|--------------|
| 6 | 0.000062000  | 0.000104000  | -1.005939000 |
| 6 | 0.000049000  | 0.000126000  | 1.005939000  |
| 5 | -0.193646000 | -1.157594000 | 0.000011000  |
| 5 | 1.099441000  | 0.411062000  | 0.000002000  |
| 5 | -0.905869000 | 0.746364000  | -0.000014000 |
| 1 | 2.200881000  | 0.822591000  | 0.000005000  |
| 1 | -1.813283000 | 1.494111000  | -0.000028000 |
| 1 | -0.387896000 | -2.317246000 | 0.000023000  |

**2e**

|   |              |              |              |
|---|--------------|--------------|--------------|
| 6 | -1.117429000 | -0.000039000 | -0.000063000 |
| 6 | 1.117442000  | 0.000036000  | -0.000049000 |
| 4 | 0.000053000  | -0.877500000 | -0.819764000 |
| 4 | -0.000068000 | 1.148871000  | -0.349830000 |
| 4 | -0.000003000 | -0.271366000 | 1.169763000  |

Cartesian coordinates of the optimized geometries calculated MP2(full)/6-311++G\*\* level.

**I**

|   |              |              |              |
|---|--------------|--------------|--------------|
| 6 | -0.000066000 | 0.000125000  | 0.800963000  |
| 6 | 0.000084000  | -0.000131000 | -0.800873000 |
| 6 | 1.289468000  | -0.098369000 | 0.000096000  |
| 6 | -0.729932000 | -1.067495000 | 0.000065000  |
| 6 | -0.559546000 | 1.165871000  | -0.000232000 |
| 1 | 0.019433000  | 2.085594000  | -0.000311000 |
| 1 | -1.639297000 | 1.289486000  | -0.000329000 |
| 1 | 1.796483000  | -1.059652000 | 0.000259000  |
| 1 | 1.936406000  | 0.774900000  | 0.000037000  |
| 1 | -0.297165000 | -2.064400000 | 0.000277000  |
| 1 | -1.815916000 | -1.025931000 | -0.000049000 |

**2a**

|   |              |              |              |
|---|--------------|--------------|--------------|
| 6 | 0.000029000  | 0.000119000  | -0.864542000 |
| 6 | 0.000020000  | 0.000099000  | 0.864543000  |
| 6 | 1.145104000  | 0.544513000  | 0.000012000  |
| 6 | -1.044145000 | 0.719336000  | 0.000003000  |
| 6 | -0.100943000 | -1.263766000 | -0.000015000 |
| 9 | 0.910325000  | -2.124647000 | -0.000020000 |
| 9 | -1.236073000 | -1.953165000 | -0.000029000 |
| 9 | 1.385202000  | 1.850702000  | 0.000028000  |
| 9 | 2.309648000  | -0.093949000 | 0.000011000  |
| 9 | -1.073895000 | 2.047079000  | 0.000018000  |
| 9 | -2.295250000 | 0.273780000  | -0.000009000 |

**2b**

|    |              |              |              |
|----|--------------|--------------|--------------|
| 6  | -0.000017000 | -0.000020000 | 0.996525000  |
| 6  | 0.000011000  | -0.000025000 | -0.996525000 |
| 14 | -1.392461000 | -0.749906000 | -0.000014000 |
| 14 | 0.046767000  | 1.580818000  | -0.000004000 |
| 14 | 1.345691000  | -0.830905000 | 0.000018000  |
| 1  | 1.397031000  | -2.301539000 | 0.000024000  |
| 1  | 2.683533000  | -0.218080000 | 0.000040000  |
| 1  | -2.691649000 | -0.058896000 | -0.000039000 |
| 1  | -1.530798000 | -2.214915000 | -0.000014000 |
| 1  | -1.152809000 | 2.433112000  | -0.000025000 |
| 1  | 1.294765000  | 2.360498000  | 0.000015000  |

**2c**

|    |              |              |              |
|----|--------------|--------------|--------------|
| 6  | 0.000043000  | -0.000163000 | -1.046342000 |
| 6  | 0.000013000  | -0.000169000 | 1.046343000  |
| 14 | 1.377560000  | -0.666384000 | 0.000018000  |
| 14 | -0.111623000 | 1.525977000  | 0.000003000  |
| 14 | -1.265909000 | -0.859747000 | -0.000021000 |
| 9  | -1.337077000 | -2.450326000 | -0.000027000 |

|   |              |              |              |
|---|--------------|--------------|--------------|
| 9 | -2.770387000 | -0.338602000 | -0.000041000 |
| 9 | 2.790230000  | 0.068086000  | 0.000040000  |
| 9 | 1.679488000  | -2.229672000 | 0.000017000  |
| 9 | 1.091590000  | 2.568701000  | 0.000024000  |
| 9 | -1.453922000 | 2.382274000  | -0.000013000 |

**2d**

|   |              |              |              |
|---|--------------|--------------|--------------|
| 6 | 0.000009000  | 0.000013000  | -1.032679000 |
| 6 | 0.000013000  | -0.000012000 | 1.032679000  |
| 5 | 0.622062000  | 0.981951000  | 0.000011000  |
| 5 | -1.161369000 | 0.047623000  | 0.000002000  |
| 5 | 0.539224000  | -1.029755000 | -0.000014000 |
| 1 | -2.339164000 | 0.096974000  | 0.000005000  |
| 1 | 1.086298000  | -2.073427000 | -0.000028000 |
| 1 | 1.253146000  | 1.977350000  | 0.000023000  |

**2e**

|   |              |              |              |
|---|--------------|--------------|--------------|
| 6 | 1.139407000  | -0.000164000 | -0.000090000 |
| 6 | -1.139427000 | 0.000095000  | 0.000081000  |
| 4 | 0.000008000  | 0.658931000  | -1.011608000 |
| 4 | -0.000243000 | -1.205598000 | -0.064745000 |
| 4 | 0.000265000  | 0.546770000  | 1.076365000  |
